# Supplementary material for: The Role of SOX2 and SOX9 in Radioresistance and Tumor Recurrence
Source: MDPI journal article supplement (doi:10.3390/cancers16020439), 2024-01-19
Supplement: s1 [file s1]

| Gene Name | Gene description                               | Category       | log2FC | lfcSE | padj  | Spearman's Correlation SOX2 | Spearman's Correlation SOX9 | SOX_Group       |
|-----------|------------------------------------------------|----------------|--------|-------|-------|-----------------------------|-----------------------------|-----------------|
| ADAD2     | Adenosine Deaminase Domain Containing 2        | Protein coding | -1,158 | 0,186 | 0,000 | 0,371                       | -0,223                      | SOX2HighSOX9Low |
| AKR1C3    | Aldo-Keto Reductase Family 1 Member C3         | Protein coding | -2,298 | 0,291 | 0,000 | 0,508                       | -0,208                      | SOX2HighSOX9Low |
| ALDH3A1   | Aldehyde Dehydrogenase 3 Family Member A1      | Protein coding | -2,712 | 0,317 | 0,000 | 0,671                       | -0,283                      | SOX2HighSOX9Low |
| EVPLL     | Envoplakin Like                                | Protein coding | -1,598 | 0,284 | 0,000 | 0,414                       | -0,268                      | SOX2HighSOX9Low |
| GCHFR     | GTP Cyclohydrolase                             | Protein coding | -1,202 | 0,166 | 0,000 | 0,401                       | -0,241                      | SOX2HighSOX9Low |
| GSTA3     | Glutathione S-Transferase Alpha 3              | Protein coding | -1,746 | 0,465 | 0,000 | 0,277                       | -0,224                      | SOX2HighSOX9Low |
| GSTM2     | Glutathione S-Transferase Mu 2                 | Protein coding | -2,486 | 0,252 | 0,000 | 0,449                       | -0,240                      | SOX2HighSOX9Low |
| HOGA1     | 4-Hydroxy-2-Oxoglutarate Aldolase 1            | Protein coding | -1,187 | 0,216 | 0,000 | 0,418                       | -0,236                      | SOX2HighSOX9Low |
| MIR9-3HG  | MIR9-3 Host Gene                               | RNA gene       | -1,195 | 0,246 | 0,000 | 0,352                       | -0,24                       | SOX2HighSOX9Low |
| NKD2      | NKD Inhibitor Of WNT Signaling Pathway 2       | Protein coding | -1,297 | 0,184 | 0,000 | 0,330                       | -0,215                      | SOX2HighSOX9Low |
| PDIA2     | Protein Disulfide Isomerase Family A Member 2  | Protein coding | -1,247 | 0,413 | 0,002 | 0,206                       | -0,209                      | SOX2HighSOX9Low |
| SERPINI1  | Serpin Family I Member 1                       | Protein coding | -2,606 | 0,235 | 0,000 | 0,402                       | -0,248                      | SOX2HighSOX9Low |
| SLC25A48  | Solute Carrier Family 25 Member 48             | Protein coding | -2,090 | 0,302 | 0,000 | 0,436                       | -0,215                      | SOX2HighSOX9Low |
| TSGA10IP  | Testis Specific 10 Interacting Protein         | Protein coding | -2,339 | 0,375 | 0,000 | 0,261                       | -0,264                      | SOX2HighSOX9Low |
| UGT1A7    | UDP Glucuronosyltransferase Family 1 Member A7 | Protein coding | -4,791 | 0,437 | 0,000 | 0,672                       | -0,202                      | SOX2HighSOX9Low |
| UGT1A8    | UDP Glucuronosyltransferase Family 1 Member A8 | Protein coding | -4,877 | 0,595 | 0,000 | 0,559                       | -0,219                      | SOX2HighSOX9Low |
| ACTN1     | Actinin Alpha 1                                | Protein coding | 1,112  | 0,124 | 0,000 | -0,426                      | 0,327                       | SOX2LowSOX9High |
| ADRA1B    | Adrenoceptor Alpha 1B                          | Protein coding | 1,191  | 0,300 | 0,000 | -0,262                      | 0,319                       | SOX2LowSOX9High |
| ADTRP     | Androgen Dependent TFPI Regulating Protein     | Protein coding | 1,525  | 0,204 | 0,000 | -0,378                      | 0,209                       | SOX2LowSOX9High |
| ANTXR2    | ANTXR Cell Adhesion Molecule 2                 | Protein coding | 1,166  | 0,172 | 0,000 | -0,441                      | 0,232                       | SOX2LowSOX9High |
| APCDD1L   | APC Down-Regulated 1 Like                      | Protein coding | 1,458  | 0,264 | 0,000 | -0,255                      | 0,247                       | SOX2LowSOX9High |
| ARHGAP29  | Rho GTPase Activating Protein 29               | Protein coding | 1,007  | 0,171 | 0,000 | -0,388                      | 0,288                       | SOX2LowSOX9High |
| BCAR3     | BCAR3 Adaptor Protein, NSP Family Member       | Protein coding | 1,498  | 0,157 | 0,000 | -0,550                      | 0,277                       | SOX2LowSOX9High |

|              |                                                                                |                |       |       |       |        |       |                 |
|--------------|--------------------------------------------------------------------------------|----------------|-------|-------|-------|--------|-------|-----------------|
| CAMK2N1      | Calcium/Calmodulin Dependent Protein Kinase II Inhibitor 1                     | Protein coding | 1,017 | 0,188 | 0,000 | -0,428 | 0,279 | SOX2LowSOX9High |
| CCBE1        | Collagen And Calcium Binding EGF Domains 1                                     | Protein coding | 1,952 | 0,265 | 0,000 | -0,462 | 0,216 | SOX2LowSOX9High |
| CDH3         | Cadherin 3                                                                     | Protein coding | 1,253 | 0,128 | 0,000 | -0,470 | 0,233 | SOX2LowSOX9High |
| CEBPB        | CCAAT Enhancer Binding Protein Beta                                            | Protein coding | 1,136 | 0,114 | 0,000 | -0,464 | 0,240 | SOX2LowSOX9High |
| CGB8         | Chorionic Gonadotropin Subunit Beta 8                                          | Protein coding | 2,811 | 0,420 | 0,000 | -0,354 | 0,214 | SOX2LowSOX9High |
| CHI3L2       | Chitinase 3 Like 2                                                             | Protein coding | 1,402 | 0,260 | 0,000 | -0,209 | 0,200 | SOX2LowSOX9High |
| DCBLD1       | Discoidin, CUB And LCCL Domain Containing 1                                    | Protein coding | 1,291 | 0,134 | 0,000 | -0,431 | 0,338 | SOX2LowSOX9High |
| DUSP4        | Dual Specificity Phosphatase 4                                                 | Protein coding | 1,085 | 0,194 | 0,000 | -0,365 | 0,295 | SOX2LowSOX9High |
| DUSP6        | Dual Specificity Phosphatase 6                                                 | Protein coding | 1,338 | 0,150 | 0,000 | -0,362 | 0,265 | SOX2LowSOX9High |
| ELFN2        | Extracellular Leucine Rich Repeat And Fibronectin Type III Domain Containing 2 | Protein coding | 2,042 | 0,334 | 0,000 | -0,263 | 0,244 | SOX2LowSOX9High |
| EVA1A        | Eva-1 Homolog A, Regulator Of Programmed Cell Death                            | Protein coding | 1,371 | 0,222 | 0,000 | -0,392 | 0,295 | SOX2LowSOX9High |
| FHL2         | Four And A Half LIM Domains 2                                                  | Protein coding | 1,333 | 0,122 | 0,000 | -0,547 | 0,226 | SOX2LowSOX9High |
| FOSL1        | FOS Like 1, AP-1 Transcription Factor Subunit                                  | Protein coding | 1,041 | 0,177 | 0,000 | -0,337 | 0,214 | SOX2LowSOX9High |
| FOXC2        | Forkhead Box C2                                                                | Protein coding | 2,064 | 0,249 | 0,000 | -0,256 | 0,265 | SOX2LowSOX9High |
| FRMD5        | FERM Domain Containing 5                                                       | Protein coding | 1,008 | 0,259 | 0,000 | -0,293 | 0,219 | SOX2LowSOX9High |
| <b>INHBA</b> | Inhibin Subunit Beta A                                                         | Protein coding | 1,609 | 0,218 | 0,000 | -0,391 | 0,296 | SOX2LowSOX9High |
| INPP4B       | Inositol Polyphosphate-4-Phosphatase Type II B                                 | Protein coding | 1,417 | 0,179 | 0,000 | -0,445 | 0,238 | SOX2LowSOX9High |
| <b>ITGB6</b> | Integrin Subunit Beta 6                                                        | Protein coding | 1,392 | 0,188 | 0,000 | -0,253 | 0,249 | SOX2LowSOX9High |
| KIF12        | Kinesin Family Member 12                                                       | Protein coding | 1,685 | 0,271 | 0,000 | -0,458 | 0,220 | SOX2LowSOX9High |
| L1CAM        | L1 Cell Adhesion Molecule                                                      | Protein coding | 1,488 | 0,278 | 0,000 | -0,413 | 0,224 | SOX2LowSOX9High |
| LAMC2        | Laminin Subunit Gamma 2                                                        | Protein coding | 1,285 | 0,204 | 0,000 | -0,245 | 0,259 | SOX2LowSOX9High |
| LGALS1       | Galectin 1                                                                     | Protein coding | 1,123 | 0,178 | 0,000 | -0,465 | 0,242 | SOX2LowSOX9High |
| LINC00452    | Long Intergenic Non-Protein Coding RNA 452                                     | RNA gene       | 2,161 | 0,391 | 0,000 | -0,203 | 0,233 | SOX2LowSOX9High |

|                 |                                                          |                |       |       |       |        |       |                 |
|-----------------|----------------------------------------------------------|----------------|-------|-------|-------|--------|-------|-----------------|
| <b>LTBP1</b>    | Latent Transforming Growth Factor Beta Binding Protein 1 | Protein coding | 1,178 | 0,174 | 0,000 | -0,282 | 0,232 | SOX2LowSOX9High |
| MANCR           | Mitotically Associated Long Non Coding RNA               | RNA gene       | 1,507 | 0,265 | 0,000 | -0,316 | 0,21  | SOX2LowSOX9High |
| NOX5            | NADPH Oxidase 5                                          | Protein coding | 2,188 | 0,226 | 0,000 | -0,388 | 0,289 | SOX2LowSOX9High |
| PCDHGC5         | Protocadherin Gamma Subfamily C, 5                       | Protein coding | 2,029 | 0,324 | 0,000 | -0,315 | 0,211 | SOX2LowSOX9High |
| PMEPA1          | Prostate Transmembrane Protein, Androgen Induced 1       | Protein coding | 1,247 | 0,167 | 0,000 | -0,336 | 0,244 | SOX2LowSOX9High |
| PPP4R4          | Protein Phosphatase 4 Regulatory Subunit 4               | Protein coding | 1,416 | 0,242 | 0,000 | -0,265 | 0,269 | SOX2LowSOX9High |
| PRDM8           | PR/SET Domain 8                                          | Protein coding | 1,120 | 0,163 | 0,000 | -0,357 | 0,270 | SOX2LowSOX9High |
| RP1             | RP1 Axonemal Microtubule Associated                      | Protein coding | 1,723 | 0,306 | 0,000 | -0,249 | 0,252 | SOX2LowSOX9High |
| RPSAP52         | Ribosomal Protein SA Pseudogene 52                       | Pseudogene     | 1,927 | 0,273 | 0,000 | -0,384 | 0,299 | SOX2LowSOX9High |
| RTTN            | Rotatin                                                  | Protein coding | 1,038 | 0,153 | 0,000 | -0,356 | 0,215 | SOX2LowSOX9High |
| SEC14L2         | SEC14 Like Lipid Binding 2                               | Protein coding | 1,535 | 0,169 | 0,000 | -0,433 | 0,392 | SOX2LowSOX9High |
| SERPINB7        | Serpin Family B Member 7                                 | Protein coding | 1,747 | 0,278 | 0,000 | -0,331 | 0,228 | SOX2LowSOX9High |
| <b>SERPINE1</b> | Serpin Family E Member 1                                 | Protein coding | 1,543 | 0,210 | 0,000 | -0,361 | 0,376 | SOX2LowSOX9High |
| SH3TC2          | SH3 Domain And Tetratricopeptide Repeats 2               | Protein coding | 1,219 | 0,189 | 0,000 | -0,432 | 0,234 | SOX2LowSOX9High |
| SRPX            | Sushi Repeat Containing Protein X-Linked                 | Protein coding | 1,024 | 0,226 | 0,000 | -0,290 | 0,231 | SOX2LowSOX9High |
| TENM3           | Teneurin Transmembrane Protein 3                         | Protein coding | 1,071 | 0,222 | 0,000 | -0,313 | 0,231 | SOX2LowSOX9High |
| <b>THBS1</b>    | Thrombospondin 1                                         | Protein coding | 1,120 | 0,212 | 0,000 | -0,246 | 0,216 | SOX2LowSOX9High |
| TINAGL1         | Tubulointerstitial Nephritis Antigen Like 1              | Protein coding | 1,253 | 0,177 | 0,000 | -0,277 | 0,344 | SOX2LowSOX9High |
| TMEM92          | Transmembrane Protein 92                                 | Protein coding | 1,716 | 0,187 | 0,000 | -0,587 | 0,225 | SOX2LowSOX9High |
| TNFRSF12A       | TNF Receptor Superfamily Member 12A                      | Protein coding | 1,287 | 0,129 | 0,000 | -0,497 | 0,290 | SOX2LowSOX9High |
| TNS4            | Tensin 4                                                 | Protein coding | 1,070 | 0,142 | 0,000 | -0,460 | 0,204 | SOX2LowSOX9High |
| TREM1           | Triggering Receptor Expressed On Myeloid Cells 1         | Protein coding | 1,069 | 0,245 | 0,000 | -0,337 | 0,209 | SOX2LowSOX9High |
| TRIML2          | Tripartite Motif Family Like 2                           | Protein coding | 3,328 | 0,405 | 0,000 | -0,499 | 0,205 | SOX2LowSOX9High |
