# Supplementary material for: The Role of SOX2 and SOX9 in Radioresistance and Tumor Recurrence
Source: MDPI journal article supplement (doi:10.3390/cancers16020439), 2024-01-19
Supplement: s1 [file s1]

---

List of Primers used for Real Time qPCR

---

| Gene     | Forward (5'-3')        | Reverse (5'-3')        |
|----------|------------------------|------------------------|
| INHBA    | ATGACATTGGAAGGAGGGCA   | TGGGGACTTTTAGGAAGAGCC  |
| SOX2     | GCCGAGTGGAACTTTTGTCG   | GCAGCGTGACTTATCCTTCTT  |
| SOX9     | CGAAAGCGGAGCTCGAAACT   | GTTCCGGGGTTGAAACTGG    |
| Serpine1 | TCGAGGTGAACGAGAGTGGCA  | AAGGACTGTTCTGTGGGGTTGT |
| GAPDH    | AGCCTCAAGATCATCAGCAATG | CAGTCTTCTGGGTGGCAGTG   |
| ACTB     | TCCCTGGAGAAGAGCTACGA   | AGGAAGGAAGGCTGGAAGAG   |

---
