# Supplementary material for: The Role of SOX2 and SOX9 in Radioresistance and Tumor Recurrence
Source: MDPI journal article supplement (doi:10.3390/cancers16020439), 2024-01-19
Supplement: s1 [file s1]

| Correlated Gene | Spearman's Correlation SOX2 | p-Value     | Spearman's Correlation SOX9 | p-Value     |
|-----------------|-----------------------------|-------------|-----------------------------|-------------|
| UGT1A7          | 0,672168643                 | 1,12530E-30 | -0,2024429                  | 0,002384367 |
| ALDH3A1         | 0,670920841                 | 1,57961E-30 | -0,2828023                  | 1,80900E-05 |
| UGT1A8          | 0,559019725                 | 9,90972E-20 | -0,2185055                  | 0,001021912 |
| AKR1C3          | 0,508214372                 | 4,77727E-16 | -0,2075712                  | 0,001831420 |
| NPL             | 0,48615644                  | 1,24837E-14 | -0,2383943                  | 0,000328270 |
| KHK             | 0,450784104                 | 1,46783E-12 | -0,2184638                  | 0,001024243 |
| GSTM2           | 0,448848192                 | 1,87606E-12 | -0,2404763                  | 0,000289831 |
| SLC25A48        | 0,436236069                 | 8,93940E-12 | -0,2153006                  | 0,001216088 |
| KEAP1           | 0,428427507                 | 2,27675E-11 | -0,2046873                  | 0,002125960 |
| ABCB6           | 0,424134737                 | 3,76818E-11 | -0,3061501                  | 3,18606E-06 |
| HOGA1           | 0,418008486                 | 7,64027E-11 | -0,235814                   | 0,000382479 |
| EVPLL           | 0,414120911                 | 1,18774E-10 | -0,267538                   | 5,19325E-05 |
| SERPINI1        | 0,401966428                 | 4,55159E-10 | -0,2483465                  | 0,000179227 |
| GCHFR           | 0,401024984                 | 5,03943E-10 | -0,24071                    | 0,000285788 |
| OTOP3           | 0,392911286                 | 1,19613E-09 | -0,2396772                  | 0,000304060 |
| SEMA3G          | 0,389681121                 | 1,67657E-09 | -0,2073082                  | 0,001856646 |
| METTL7A         | 0,383728379                 | 3,09414E-09 | -0,2112125                  | 0,001512818 |
| ARMC7           | 0,381863887                 | 3,73942E-09 | -0,2710743                  | 4,09019E-05 |
| SMAD5-AS1       | 0,371651921                 | 1,03346E-08 | -0,2558629                  | 0,000111596 |
| ADAD2           | 0,370934688                 | 1,10849E-08 | -0,2233062                  | 0,000783834 |
| PRDX2           | 0,365645073                 | 1,84896E-08 | -0,2419263                  | 0,000265581 |
| CYP4F12         | 0,363667501                 | 2,23342E-08 | -0,2156144                  | 0,001195679 |
| AHRR            | 0,359295194                 | 3,37603E-08 | -0,2164954                  | 0,001140052 |
| MIR9-3HG        | 0,351908643                 | 6,69073E-08 | -0,2441382                  | 0,000232203 |
| EXPH5           | 0,349985716                 | 7,97207E-08 | -0,2089271                  | 0,001706244 |
| ATPAF1          | 0,343850096                 | 1,38359E-07 | -0,2481972                  | 0,000180895 |
| PANK1           | 0,336018794                 | 2,74941E-07 | -0,2140693                  | 0,001299296 |
| NKD2            | 0,330143965                 | 4,54590E-07 | -0,2148993                  | 0,001242657 |
| SLC48A1         | 0,32906401                  | 4,98048E-07 | -0,2667869                  | 5,46107E-05 |
| LCMT2           | 0,326787229                 | 6,03067E-07 | -0,2615397                  | 7,72768E-05 |
| ACSS2           | 0,325718095                 | 6,59406E-07 | -0,2679783                  | 5,04203E-05 |
| REEP1           | 0,313048635                 | 1,85187E-06 | -0,2577848                  | 9,86333E-05 |
| ADI1            | 0,309383495                 | 2,47484E-06 | -0,3422258                  | 1,59786E-07 |
| CBFA2T3         | 0,300567464                 | 4,89350E-06 | -0,2360969                  | 0,000376153 |
| CBR1            | 0,300473319                 | 4,92867E-06 | -0,2136397                  | 0,001329533 |
| PCBD2           | 0,298995143                 | 5,51336E-06 | -0,2092192                  | 0,001680316 |
| MLYCD           | 0,293147367                 | 8,53911E-06 | -0,2625061                  | 7,25302E-05 |
| GABRQ           | 0,291363532                 | 9,73969E-06 | -0,2143868                  | 0,001277352 |
| DCXR            | 0,290702859                 | 1,02237E-05 | -0,2707302                  | 4,18695E-05 |
| SHMT1           | 0,28984582                  | 1,08856E-05 | -0,2327846                  | 0,000456689 |
| POMGNT2         | 0,287249814                 | 1,31474E-05 | -0,2004681                  | 0,002634997 |
| RPP25           | 0,28642091                  | 1,39589E-05 | -0,2149739                  | 0,001237674 |

|            |              |             |            |             |
|------------|--------------|-------------|------------|-------------|
| SFXN2      | 0,282614012  | 1,83338E-05 | -0,2069392 | 0,001892579 |
| FBXL22     | 0,282319676  | 1,87213E-05 | -0,2543068 | 0,000123243 |
| SULT1A1    | 0,281650925  | 1,96307E-05 | -0,2000558 | 0,002690250 |
| SLC25A10   | 0,279528888  | 2,28008E-05 | -0,2352507 | 0,000395369 |
| GSTA3      | 0,277254233  | 2,67332E-05 | -0,2244243 | 0,000736286 |
| PROS1      | 0,265582527  | 5,91783E-05 | -0,2300944 | 0,000533557 |
| KAT14      | 0,263089323  | 6,97992E-05 | -0,2385447 | 0,000325342 |
| MCUR1      | 0,262756642  | 7,13448E-05 | -0,2183508 | 0,001030589 |
| MYCL       | 0,26258289   | 7,21648E-05 | -0,232382  | 0,000467498 |
| TSGA10IP   | 0,261158532  | 7,92283E-05 | -0,2639299 | 6,60330E-05 |
| LDHD       | 0,256726457  | 0,000105585 | -0,2474549 | 0,000189407 |
| SPIN2A     | 0,248888587  | 0,000173291 | -0,2047556 | 0,002118517 |
| ZNF503-AS2 | 0,24110281   | 0,000279110 | -0,2000407 | 0,002692301 |
| PDZD4      | 0,237965744  | 0,000336748 | -0,2217448 | 0,000854979 |
| ZNF540     | 0,236796613  | 0,000360924 | -0,2253591 | 0,000698590 |
| ADAL       | 0,233998693  | 0,000425476 | -0,20525   | 0,002065307 |
| SELENOP    | 0,231711091  | 0,000486041 | -0,2045942 | 0,002136147 |
| KRT4       | 0,226189636  | 0,000666603 | -0,2177783 | 0,001063285 |
| CYP1A2     | 0,221491903  | 0,000867045 | -0,2519494 | 0,000143074 |
| MPC1       | 0,22112363   | 0,000884898 | -0,2228886 | 0,000802307 |
| USH1G      | 0,220489567  | 0,000916433 | -0,2001132 | 0,002682494 |
| HADH       | 0,216987768  | 0,001110008 | -0,2118142 | 0,001465347 |
| BRCC3      | 0,216245433  | 0,001155590 | -0,2066178 | 0,001924391 |
| VAR52      | 0,215755233  | 0,001186625 | -0,2435159 | 0,000241174 |
| GPR55      | 0,214783006  | 0,001250452 | -0,2434846 | 0,000241634 |
| CCDC152    | 0,213959996  | 0,001306928 | -0,246139  | 0,000205419 |
| STX19      | 0,208639269  | 0,001732140 | -0,2098539 | 0,001625226 |
| PDIA2      | 0,205545596  | 0,002034082 | -0,2086775 | 0,001728682 |
| NECAB3     | 0,201245087  | 0,002533664 | -0,234846  | 0,000404878 |
| AVPR2      | 0,200891513  | 0,002579331 | -0,2628889 | 7,07264E-05 |
| ACTG1      | -0,200351256 | 0,002650554 | 0,26322783 | 6,91650E-05 |
| PLEKHG2    | -0,200494096 | 0,002631552 | 0,23151956 | 0,000491458 |
| RHBDF1     | -0,201278633 | 0,002529370 | 0,20189761 | 0,00245131  |
| KLF7       | -0,2023034   | 0,002401330 | 0,22888027 | 0,00057203  |
| LINC00452  | -0,203031215 | 0,002314003 | 0,2327531  | 0,000457526 |
| EZR        | -0,203661461 | 0,002240727 | 0,20667733 | 0,001918463 |
| NFIL3      | -0,206202279 | 0,001966245 | 0,35167274 | 6,837E-08   |
| CHI3L2     | -0,208849144 | 0,001713220 | 0,20012293 | 0,002681188 |
| CSNK1E     | -0,214851663 | 0,001245844 | 0,26231344 | 7,34539E-05 |
| WWC2       | -0,214922001 | 0,001241138 | 0,20168659 | 0,002477672 |
| MARK3      | -0,218930173 | 0,000998437 | 0,20611354 | 0,001975289 |
| UBASH3B    | -0,220984037 | 0,000891754 | 0,32530364 | 6,82572E-07 |
| GMEB1      | -0,222990287 | 0,000797771 | 0,22984227 | 0,000541344 |

|                  |              |             |            |             |
|------------------|--------------|-------------|------------|-------------|
| <b>LTBR</b>      | -0,224643766 | 0,000727271 | 0,2041192  | 0,002188839 |
| <b>LRRC8C</b>    | -0,225342816 | 0,000699232 | 0,28950279 | 1,11618E-05 |
| <b>ADAMTS6</b>   | -0,22655918  | 0,000652810 | 0,2278534  | 0,000606554 |
| <b>KDSR</b>      | -0,228802353 | 0,000574584 | 0,20295808 | 0,002322645 |
| <b>LASP1</b>     | -0,230940622 | 0,000508174 | 0,22900146 | 0,000568077 |
| <b>VIM</b>       | -0,231811728 | 0,000483217 | 0,22536879 | 0,000698210 |
| <b>C3ORF52</b>   | -0,234749684 | 0,000407171 | 0,2991553  | 5,44696E-06 |
| <b>PPP1R14C</b>  | -0,235664075 | 0,000385871 | 0,27685172 | 2,74926E-05 |
| <b>GPRC5A</b>    | -0,237015643 | 0,000356275 | 0,22153592 | 0,000864933 |
| <b>CHST15</b>    | -0,237321883 | 0,000349869 | 0,23971229 | 0,000303421 |
| <b>LAMC2</b>     | -0,244683545 | 0,000224596 | 0,25939497 | 8,88741E-05 |
| <b>CDCP1</b>     | -0,245683424 | 0,000211251 | 0,23538164 | 0,000392337 |
| <b>SLC20A1</b>   | -0,246153064 | 0,000205241 | 0,33995446 | 1,95158E-07 |
| <b>THBS1</b>     | -0,246403033 | 0,000202108 | 0,2160052  | 0,001170705 |
| <b>TES</b>       | -0,248531563 | 0,000177179 | 0,26338799 | 6,84384E-05 |
| <b>RP1</b>       | -0,248857616 | 0,000173625 | 0,251604   | 0,000146219 |
| <b>LINC01119</b> | -0,252720723 | 0,000136279 | 0,21180464 | 0,001466086 |
| <b>ITGB6</b>     | -0,252774555 | 0,000135816 | 0,24926849 | 0,000169240 |
| <b>APCDD1L</b>   | -0,254850061 | 0,000119053 | 0,24670494 | 0,000198383 |
| <b>FOXC2</b>     | -0,256316334 | 0,000108401 | 0,26477094 | 6,24563E-05 |
| <b>CTSV</b>      | -0,256497048 | 0,000107152 | 0,23835855 | 0,000328969 |
| <b>ABL2</b>      | -0,258186237 | 9,61101E-05 | 0,32613038 | 6,37108E-07 |
| <b>ICAM1</b>     | -0,260477085 | 8,28326E-05 | 0,2875777  | 1,28390E-05 |
| <b>DCBLD2</b>    | -0,261329796 | 7,83459E-05 | 0,30619773 | 3,17430E-06 |
| <b>ADRA1B</b>    | -0,262021885 | 7,48731E-05 | 0,31945888 | 1,10477E-06 |
| <b>ELFN2</b>     | -0,263208684 | 6,92523E-05 | 0,24364972 | 0,000239218 |
| <b>PTPRE</b>     | -0,264347828 | 6,42322E-05 | 0,21000701 | 0,001612190 |
| <b>ENC1</b>      | -0,264367306 | 6,41494E-05 | 0,33537926 | 2,90559E-07 |
| <b>PPP4R4</b>    | -0,264571898 | 6,32859E-05 | 0,26919796 | 4,64454E-05 |
| <b>SLC35F2</b>   | -0,265129119 | 6,09891E-05 | 0,21903838 | 0,000992536 |
| <b>MCL1</b>      | -0,269443531 | 4,56816E-05 | 0,22736746 | 0,000623554 |
| <b>GFPT2</b>     | -0,276619068 | 2,79408E-05 | 0,27854416 | 2,44309E-05 |
| <b>TINAGL1</b>   | -0,276828999 | 2,75361E-05 | 0,3443706  | 1,32097E-07 |
| <b>LTBP1</b>     | -0,282466844 | 1,85266E-05 | 0,23198811 | 0,000478303 |
| <b>TMCC3</b>     | -0,28461377  | 1,58954E-05 | 0,27715147 | 2,69252E-05 |
| <b>COL13A1</b>   | -0,287433774 | 1,29735E-05 | 0,22834462 | 0,000589805 |
| <b>SRPX</b>      | -0,2899075   | 1,08367E-05 | 0,23083674 | 0,000511229 |
| <b>FRMD5</b>     | -0,292728733 | 8,80755E-06 | 0,21861308 | 0,001015917 |
| <b>FOXD1</b>     | -0,293141957 | 8,54253E-06 | 0,22280957 | 0,000805846 |
| <b>MED15</b>     | -0,293824774 | 8,12112E-06 | 0,21843889 | 0,001025638 |
| <b>MYADM</b>     | -0,298066685 | 5,91371E-06 | 0,21042255 | 0,001577281 |
| <b>LITAF</b>     | -0,307841474 | 2,79273E-06 | 0,30263972 | 4,17724E-06 |
| <b>MICAL2</b>    | -0,308202902 | 2,71491E-06 | 0,260476   | 8,28385E-05 |

|           |              |             |            |             |
|-----------|--------------|-------------|------------|-------------|
| TENM3     | -0,313222856 | 1,82634E-06 | 0,23100122 | 0,000506400 |
| DNAJB5    | -0,31427143  | 1,67965E-06 | 0,23373033 | 0,000432199 |
| PCDHGC5   | -0,315364996 | 1,53867E-06 | 0,21108919 | 0,001522718 |
| MANCR     | -0,316318061 | 1,42509E-06 | 0,21144213 | 0,001494536 |
| C1ORF74   | -0,31735439  | 1,31068E-06 | 0,25437176 | 0,000122735 |
| PDE7A     | -0,317529693 | 1,29222E-06 | 0,2343612  | 0,000416547 |
| C10ORF55  | -0,31762492  | 1,28229E-06 | 0,26364229 | 6,72995E-05 |
| ST3GAL5   | -0,319606281 | 1,09157E-06 | 0,2340085  | 0,000425232 |
| TIMP3     | -0,320916729 | 9,80666E-07 | 0,23793328 | 0,000337398 |
| PLAU      | -0,325032031 | 6,98175E-07 | 0,27620786 | 2,87499E-05 |
| SERPINB7  | -0,33058006  | 4,38092E-07 | 0,22849828 | 0,000584654 |
| CCDC71L   | -0,332492165 | 3,72287E-07 | 0,22186164 | 0,000849454 |
| SEMA7A    | -0,333543986 | 3,40242E-07 | 0,27988491 | 2,22371E-05 |
| GNB1      | -0,333696565 | 3,35819E-07 | 0,20364306 | 0,002242835 |
| TRAF3IP2  | -0,333795038 | 3,32994E-07 | 0,29019426 | 1,06117E-05 |
| PMEPA1    | -0,33634343  | 2,67325E-07 | 0,24424745 | 0,000230660 |
| FOSL1     | -0,337122557 | 2,49863E-07 | 0,21403574 | 0,001301634 |
| TREM1     | -0,337424468 | 2,43395E-07 | 0,2089606  | 0,001703249 |
| NME7      | -0,344884603 | 1,26181E-07 | 0,22195578 | 0,000845028 |
| TTPAL     | -0,353500442 | 5,78222E-08 | 0,21787186 | 0,001057878 |
| CGB8      | -0,354312725 | 5,36560E-08 | 0,21392522 | 0,001309365 |
| SH3KBP1   | -0,354525209 | 5,26147E-08 | 0,32235703 | 8,71217E-07 |
| RTTN      | -0,355802111 | 4,67555E-08 | 0,21544358 | 0,001206752 |
| PRDM8     | -0,357313832 | 4,06289E-08 | 0,27024863 | 4,32597E-05 |
| MSN       | -0,358283412 | 3,71147E-08 | 0,22347508 | 0,000776474 |
| TENM3-AS1 | -0,360546124 | 3,00154E-08 | 0,30489919 | 3,51033E-06 |
| SERPINE1  | -0,361473501 | 2,75009E-08 | 0,37570121 | 6,93515E-09 |
| DUSP6     | -0,361817615 | 2,66205E-08 | 0,26487698 | 6,20185E-05 |
| DUSP4     | -0,365217636 | 1,92622E-08 | 0,29544795 | 7,19717E-06 |
| MRTFA     | -0,366096317 | 1,77063E-08 | 0,27528481 | 3,06473E-05 |
| BACE2     | -0,368057119 | 1,46590E-08 | 0,23511977 | 0,000398422 |
| PLAUR     | -0,36872164  | 1,37461E-08 | 0,24709349 | 0,000193684 |
| CITED2    | -0,369365402 | 1,29142E-08 | 0,20930363 | 0,001672893 |
| DYRK3     | -0,369488763 | 1,27605E-08 | 0,26923576 | 4,63271E-05 |
| MAP3K20   | -0,370114229 | 1,20077E-08 | 0,25920018 | 9,00045E-05 |
| STK17A    | -0,370199716 | 1,19082E-08 | 0,20004718 | 0,002691422 |
| PLK3      | -0,37511254  | 7,35172E-09 | 0,29658526 | 6,61025E-06 |
| CHST11    | -0,377114462 | 6,02604E-09 | 0,31210394 | 1,99633E-06 |
| ADTRP     | -0,378122998 | 5,44885E-09 | 0,20897359 | 0,001702091 |
| ERRFI1    | -0,378416253 | 5,29130E-09 | 0,32001099 | 1,05610E-06 |
| RPSAP52   | -0,383618418 | 3,12901E-09 | 0,29882774 | 5,58358E-06 |
| NOX5      | -0,387888514 | 2,01893E-09 | 0,2886696  | 1,18604E-05 |
| ARHGAP29  | -0,3882182   | 1,95126E-09 | 0,28770222 | 1,27236E-05 |

|                  |              |              |            |             |
|------------------|--------------|--------------|------------|-------------|
| <b>INHBA</b>     | -0,39146229  | 1,39237E-09  | 0,29617297 | 6,81755E-06 |
| <b>EVA1A</b>     | -0,392218692 | 1,28634E-09  | 0,29486253 | 7,51825E-06 |
| <b>PPP1R18</b>   | -0,396411907 | 8,26151E-10  | 0,21097876 | 0,001531636 |
| <b>CANT1</b>     | -0,400063088 | 5,59007E-10  | 0,26049393 | 8,27417E-05 |
| <b>SMIM3</b>     | -0,406374985 | 2,81353E-10  | 0,24635975 | 0,000202647 |
| <b>IER5</b>      | -0,40728613  | 2,54503E-10  | 0,2193338  | 0,000976588 |
| <b>ANXA5</b>     | -0,412270374 | 1,46242E-10  | 0,22577458 | 0,000682416 |
| <b>L1CAM</b>     | -0,412718372 | 1,39075E-10  | 0,22361251 | 0,000770533 |
| <b>ITGA5</b>     | -0,416788225 | 8,78048E-11  | 0,29306729 | 8,58985E-06 |
| <b>ACTN1</b>     | -0,425553396 | 3,19271E-11  | 0,32693223 | 5,95790E-07 |
| <b>CAMK2N1</b>   | -0,427583453 | 2,51527E-11  | 0,27860259 | 2,43311E-05 |
| <b>DCBLD1</b>    | -0,430887165 | 1,70037E-11  | 0,33774153 | 2,36776E-07 |
| <b>SH3TC2</b>    | -0,431979682 | 1,49247E-11  | 0,2340085  | 0,000425232 |
| <b>SEC14L2</b>   | -0,433178013 | 1,29286E-11  | 0,39166356 | 1,36336E-09 |
| <b>KLF6</b>      | -0,440251831 | 5,47562E-12  | 0,23558941 | 0,000387571 |
| <b>ANTXR2</b>    | -0,440625162 | 5,22999E-12  | 0,23222402 | 0,000471805 |
| <b>INPP4B</b>    | -0,444617103 | 3,19037E-12  | 0,23803825 | 0,000335299 |
| <b>MICALCL</b>   | -0,457940163 | 5,84581E-13  | 0,2120717  | 0,001445446 |
| <b>KIF12</b>     | -0,458160498 | 5,68049E-13  | 0,22043871 | 0,000919006 |
| <b>TNS4</b>      | -0,460269967 | 4,31169E-13  | 0,20441245 | 0,002156173 |
| <b>CCBE1</b>     | -0,461885697 | 3,48641E-13  | 0,21624928 | 0,001155349 |
| <b>CEBPB</b>     | -0,464469675 | 2,47630E-13  | 0,24036264 | 0,000291816 |
| <b>LGALS1</b>    | -0,464565983 | 2,44478E-13  | 0,24179537 | 0,00026769  |
| <b>CDH3</b>      | -0,469836989 | 1,20550E-13  | 0,2328365  | 0,000455312 |
| <b>TNFRSF12A</b> | -0,497349888 | 2,45440E-15  | 0,29019426 | 1,06117E-05 |
| <b>TRIML2</b>    | -0,498719069 | 2,00335E-15  | 0,20544101 | 0,002045081 |
| <b>TMEM51</b>    | -0,516323779 | 1,35499E-16  | 0,27402631 | 3,34252E-05 |
| <b>FHL2</b>      | -0,547325432 | 7,93786E-19  | 0,22600074 | 0,000673757 |
| <b>BCAR3</b>     | -0,549906288 | 5,05019E-19  | 0,27681926 | 2,75547E-05 |
| <b>TMEM92</b>    | -0,586926693 | 4,892938E-22 | 0,22461996 | 0,000728244 |
