# Supplementary material for: The Role of SOX2 and SOX9 in Radioresistance and Tumor Recurrence
Source: MDPI journal article supplement (doi:10.3390/cancers16020439), 2024-01-19
Supplement: s1 [file s1]

| Ingenuity Canonical Pathways                               | -log(p-value) | Molecules                      | Key Biological Function                                                                                                                                                              |
|------------------------------------------------------------|---------------|--------------------------------|--------------------------------------------------------------------------------------------------------------------------------------------------------------------------------------|
| TGF-β Signaling                                            | 2,500         | <b>INHBA, PMEPA1, SERPINE1</b> | Cell migration, cell differentiation, apoptosis, cell growth, etc.                                                                                                                   |
| Integrin Signaling                                         | 1,610         | <b>ACTN1, BCAR3, ITGB6</b>     | Promote intracellular signals in response to the stimulus by the extracellular matrix resulting in modification in cellular shape, mobility, and progression through the cell cycle. |
| NRF2-mediated Oxidative Stress Response                    | 1,570         | FOSL1, GSTA3, GSTM2            | It is activated under oxidative stress conditions and subsequently activates several antioxidative genes and proteins.                                                               |
| ERK/MAPK Signaling                                         | 1,550         | DUSP4, DUSP6, <b>ITGB6</b>     | It is a chain of proteins in the cell that communicates a signal from a receptor on the surface of the cell to the DNA in the nucleus of the cell.                                   |
| Paxillin Signaling                                         | 1,380         | <b>ACTN1, ITGB6</b>            | Focal adhesions and it functions to adhere cells to the extracellular matrix.                                                                                                        |
| TWEAK Signaling                                            | 0,983         | TNFRSF12A                      | It is related to TNF and presented apoptotic ability                                                                                                                                 |
| IL-17A Signaling in Fibroblasts                            | 0,959         | <b>CEBPB</b>                   | Play a central role in the control of infections and chronic inflammatory conditions                                                                                                 |
| ILK Signaling                                              | 0,921         | <b>ACTN1, ITGB6</b>            | Control of cytoskeletal organization and cell motility.                                                                                                                              |
| HIF1-alpha Signaling                                       | 0,889         | ADRA1B, <b>SERPINE1</b>        | Master transcriptional regulator of cellular and developmental response to hypoxia                                                                                                   |
| RHO GDI Signaling                                          | 0,863         | CDH3, <b>ITGB6</b>             | Regulates cell migration, adhesion, proliferation and differentiation.                                                                                                               |
| Transcriptional Regulatory Network in Embryonic Stem Cells | 0,818         | L1CAM                          | Process that modulate cellular identity and modulates biological activity.                                                                                                           |
| cAMP-mediated signaling                                    | 0,804         | DUSP4, DUSP6                   | Signaling cascade used in cell communication.                                                                                                                                        |
| Wound Healing Signaling Pathway                            | 0,785         | <b>CEBPB</b> , LAMC2           | Process of tissue regeneration and repair.                                                                                                                                           |
| Actin Cytoskeleton Signaling                               | 0,777         | <b>ACTN1, ITGB6</b>            | Mediate cell motility and cell shape changes during the cell cycle and in response to extracellular stimulus                                                                         |
| Eicosanoid Signaling                                       | 0,742         | AKR1C3                         | Cell signaling, innate response, cell growth, inflammation, etc.                                                                                                                     |
| Remodeling of Epithelial Adherens Junctions                | 0,738         | <b>ACTN1</b>                   | Principle mediators of cell-cell adhesion                                                                                                                                            |
| Signaling by Rho Family GTPases                            | 0,712         | <b>CDH3, ITGB6</b>             | Rho proteins play a role in organelle development, cytoskeletal dynamics, cell movement and other common cellular functions.                                                         |
| TREM1 Signaling                                            | 0,703         | TREM1                          | Modulate the immune response stimulated by pathogen and cytokine receptors like IL-1R.                                                                                               |
| Senescence Pathway                                         | 0,646         | <b>CEBPB, SERPINE1</b>         | Process of stable cell cycle arrest that response to various intrinsic and extrinsic stimuli, associated with cellular and molecular changes.                                        |
| p53 Signaling                                              | 0,587         | <b>THBS1</b>                   | Controlling cell division and cell death.                                                                                                                                            |
| Role of Tissue Factor in Cancer                            | 0,527         | PDIA2                          | Expressed by tumor cells and contribute to tumor growth, metastasis and tumor angiogenesis.                                                                                          |
| PAK Signaling                                              | 0,521         | <b>ITGB6</b>                   | Activation of MAPK signaling in breast cancer                                                                                                                                        |
| IL-6 Signaling                                             | 0,488         | <b>CEBPB</b>                   | Cytokine produced by numerous different cell types and plays a critical role in regulating the acute inflammation and cancer progression.                                            |
| HGF Signaling                                              | 0,480         | <b>ITGB6</b>                   | Produced by stromal and mesenchymal cells, and it stimulates epithelial cell proliferation, motility, morphogenesis and angiogenesis.                                                |
| IL-12 Signaling and Production in Macrophages              | 0,472         | <b>CEBPB</b>                   | Promotes Th1 responses and induces IFNγ production by T and NK cells                                                                                                                 |
| Protein Kinase A Signaling                                 | 0,470         | DUSP4, DUSP6                   | Play a role in many cellular process, such as: proliferation, cell cycle, metabolism, etc.                                                                                           |
| RAC Signaling                                              | 0,465         | <b>ITGB6</b>                   | Control of cell-cell adhesion, cell migration, cell-matrix adhesion, cell cycle, etc.                                                                                                |
| NAD Signaling Pathway                                      | 0,445         | <b>CEBPB</b>                   | involved in cell metabolism                                                                                                                                                          |

|                                                                                |       |                             |                                                                                                                                                             |
|--------------------------------------------------------------------------------|-------|-----------------------------|-------------------------------------------------------------------------------------------------------------------------------------------------------------|
| PTEN Signaling                                                                 | 0,433 | <b>ITGB6</b>                | Promote the activation of signals from growth factor receptors on the cell surface to transcription factors in the nucleus.                                 |
| HMGB1 Signaling                                                                | 0,413 | <b>SERPINE1</b>             | Secreted in the tumor microenvironment leading to cell proliferation, differentiation, mobilization and senescence.                                         |
| Human Embryonic Stem Cell Pluripotency                                         | 0,405 | <b>INHBA</b>                |                                                                                                                                                             |
| Gαq Signaling                                                                  | 0,401 | ADRA1B                      | Signal transduction in cells leading to RhoA activation, phosphatidylinositol 3-kinase (PI3K) and implications in the regulation of the Akt pathway.        |
| WNT/β-catenin Signaling                                                        | 0,390 | CDH3                        | Biological processes such as proliferation, apoptosis, differentiation, adhesion, metabolism, gene expression, etc.                                         |
| IL-17 Signaling                                                                | 0,374 | <b>CEBPB</b>                | Pro-inflammatory cytokine involved in control infections.                                                                                                   |
| Leukocyte Extravasation Signaling                                              | 0,357 | ACTN1                       | Promote the movement of leukocytes out of the vessels and towards the site of tissue damage or infection.                                                   |
| Regulation of the Epithelial-Mesenchymal Transition Pathway                    | 0,350 | FOXC2                       | Biological process in which a non-motile epithelial cell changes to a mesenchymal phenotype with invasive capacities                                        |
| PI3K/AKT Signaling                                                             | 0,343 | <b>ITGB6</b>                | Intracellular signaling which promotes cell proliferation and apoptosis, angiogenesis and glucose metabolism.                                               |
| FAK Signaling                                                                  | 0,332 | ADRA1B, BCAR3, <b>ITGB6</b> | Plays critical roles in integrin-mediated signal transductions.                                                                                             |
| HER-2 Signaling in Breast Cancer                                               | 0,305 | <b>ITGB6</b>                | Promote cells in the breast to grow and divide at an uncontrolled rate.                                                                                     |
| AMPK Signaling                                                                 | 0,279 | ADRA1B                      | Play a role as regulator of cellular energy homeostasis.                                                                                                    |
| Sirtuin Signaling Pathway                                                      | 0,234 | DUSP6                       | Involved in metabolic regulation.                                                                                                                           |
| SAPK/JNK Signaling                                                             | 0,219 | DUSP4                       | Activated by a variety of environmental stresses, inflammatory cytokines, growth factors which may regulate the activity of multiple transcription factors. |
| Role of Macrophages, Fibroblasts and Endothelial Cells in Rheumatoid Arthritis | 0,206 | <b>CEBPB</b>                | Secretion of cytokines involved in the regulation of angiogenesis and ECM reorganization.                                                                   |
| Glucocorticoid Receptor Signaling                                              | 0,000 | <b>SERPINE1</b>             | Regulation of gene expression                                                                                                                               |
| Molecular Mechanisms of Cancer                                                 | 0,000 | <b>ITGB6</b>                | Causes by specific DNA damage                                                                                                                               |
| CDC42 Signaling                                                                | 0,000 | <b>ITGB6</b>                | Involved with Ras-mediated cellular transformation, tumorigenesis, and metastasis.                                                                          |
| Phospholipase C Signaling                                                      | 0,000 | <b>ITGB6</b>                | Activation of Protein kinase C                                                                                                                              |
| TEC Kinase Signaling                                                           | 0,000 | <b>ITGB6</b>                | Signal transducers that mediate cell-to-cell communication.                                                                                                 |
| T Cell Receptor Signaling                                                      | 0,000 | DUSP6                       | Regulation of cytokine production, cell survival, proliferation, and differentiation.                                                                       |
